# Supplementary material
Source: bioRxiv or medRxiv preprint supplement (https://www.biorxiv.org/highwire/filestream/101088/field_highwire_adjunct_files/6/324509-15.pdf)
Supplement: Supplementary file [file 324509-15.pdf]

**Supplementary Table 7.** Rejection of the null hypothesis of clonal evolution in latent and rebound sequences in the 3SEQ recombination algorithm

| ID  | p-value  | Significant for multiple comparisons | Source of parent sequences for recombination | NFL available |
|-----|----------|--------------------------------------|----------------------------------------------|---------------|
| 601 | 3.79E-21 | Yes                                  | Q <sup>2</sup> VOA, Rebound SGA              | No            |
| 602 | 1.65E-07 | Yes                                  | Q <sup>2</sup> VOA                           | Yes           |
| 603 | 4.23E-02 | No                                   | N/A                                          | Yes           |
| 605 | 3.20E-20 | Yes                                  | Q <sup>2</sup> VOA, Rebound SGA              | No            |
| 608 | 1.32E-40 | Yes                                  | Q <sup>2</sup> VOA, Rebound SGA              | No            |
| 609 | 5.35E-04 | Yes                                  | Q <sup>2</sup> VOA, Rebound SGA              | No            |
| 610 | 1.15E-01 | No                                   | N/A                                          | Yes           |
| 611 | 1.20E-19 | Yes                                  | Q <sup>2</sup> VOA, NFL, Rebound SGA         | Yes           |
| 613 | 3.23E-06 | Yes                                  | Q <sup>2</sup> VOA, NFL                      | Yes           |

NFL = Near full-length
